# Supplementary material
Source: HighWire-hosted journal article supplement (doi:10.1101/rna.071985.119)
Supplement: Supplemental_Data.docx [file Supplemental_Data.docx]

**Supplemental Data**

**Figure S1. TLR7 mRNA expression in the cells with miR-146a or AMO-146a.** HeLa cells were transfected with miR-146a mimics or AMO-146a, and infected with CVB3 (MOI = 1) 24 h post-transfection. TLR7 mRNA abundance was quantified by RT-qPCR with **C*T* method. The mRNA abundance of TLR7 was normalized by GAPDH mRNA. Error bars represent SD, *n* = 4.

**Figure S2. Effect of miR-146a on NF-B translocation in the cells without LPS treatment.** HeLa cells were first treated with miR-146a mimics, AMO-146a, and scramble RNAs, respectively. The cells were harvested 24 h post-transfection. Total, cytoplasmic and nuclear portions of the p65 subunit of NF-B were analyzed by Western blotting. Total and cytoplasmic proteins were normalized using -actin, while histidine H3 was used to normalize nuclear protein. Error bars represent SD, *n* = 3.

**Figure S3. MiR-146a may affect CVB3 replication.** HeLa cells were transfected with AMO-146a and scramble RNA, respectively. The cells were infected with CVB3 24 h post-transfection. (A) The 3D protein was detected by Western blotting 24 h p.i.. (B, C) The cells were covered with 0.8% agarose gel 1 h p.i., and the plaques were measured 24 h p.i.. Error bars represent SD, *n* = 4.

**Supplemental Dataset 1.** The microarray result of miRNAs expression in the cardiac fibroblasts infected with CVB3 for 24 hours.

**Supplemental Dataset 2.** The microarray result of miRNAs expression in the cardiac fibroblasts infected with CVB3 for 48 hours.
